# Supplementary material
Source: PubMed Central journal article supplement (PMC6456335)

# Transcriptomic profiling suggests that Promysalin alters metabolic flux, motility, and iron regulation in *Pseudomonas putida* KT2440

Krista M. Giglio<sup>1#</sup>, Colleen E. Keohane<sup>2#</sup>, Paul V. Stodghill<sup>1</sup>, Andrew D. Steele<sup>2</sup>, Christian Fetzer<sup>3</sup>, Stephan A. Sieber<sup>3</sup>, Melanie J. Filiault<sup>1,4\*</sup> and William M. Wuest<sup>2,5\*</sup>

<sup>1</sup> Emerging Pests and Pathogens Research Unit, United States Department of Agriculture-Agricultural Research Service, 538 Tower Road, Ithaca, New York USA.

<sup>2</sup> Department of Chemistry, Emory University, 1515 Dickey Drive, Atlanta, Georgia USA.

<sup>3</sup> Department of Chemistry, Center for Integrated Protein Science Munich (CIPSM), Technische Universität München, Lichtenbergstraße 4, 85747 Garching, Germany

<sup>4</sup> School of Integrated Plant Science, Section of Plant Pathology and Plant-Microbe Biology, Cornell University, 236 Tower Road, Ithaca, NY, USA.

<sup>5</sup> Emory Antibiotic Resistance Center, Emory University, 201 Dowman Dr. Atlanta, Georgia, USA

## Supporting Information

|                         |           |
|-------------------------|-----------|
| <b>Table S1</b> .....   | <b>S2</b> |
| <b>Figure S1</b> .....  | <b>S3</b> |
| <b>Table S2</b> .....   | <b>S4</b> |
| <b>Figure S2</b> .....  | <b>S4</b> |
| <b>Figure S3</b> .....  | <b>S5</b> |
| <b>Figure S4</b> .....  | <b>S5</b> |
| <b>Figure S5</b> .....  | <b>S6</b> |
| <b>Table S3</b> .....   | <b>S6</b> |
| <b>Figure S6</b> .....  | <b>S7</b> |
| <b>References</b> ..... | <b>S7</b> |

**Table S1.** All enriched proteins from AfBPP experiment. (Yellow highlighted shown in text)

| <b>Locus</b> | <b>Gene</b>   | <b>Protein</b>                                                                                            | <b>-Log t-test p-value</b> | <b>t-test Difference</b> |
|--------------|---------------|-----------------------------------------------------------------------------------------------------------|----------------------------|--------------------------|
| PP_0133      | <i>algB</i>   | Alginate biosynthesis transcriptional regulatory protein AlgB                                             | 1.17                       | 1.81                     |
| PP_0310      | <i>dgcA</i>   | Putative dimethylglycine dehydrogenase subunit (EC 1.5.8.-)                                               | 2.85                       | 3.78                     |
| PP_0325      | <i>soxA</i>   | Sarcosine oxidase subunit alpha (EC 1.5.3.1)                                                              | 3.86                       | 3.04                     |
| PP_0328      | <i>fdhA</i>   | Formaldehyde dehydrogenase (EC 1.2.1.46)                                                                  | 2.08                       | 4.67                     |
| PP_0395      | <i>ycgB</i>   | Putative type IV piliation protein                                                                        | 2.76                       | 1.74                     |
| PP_0397      | <i>yeaG</i>   | Protein kinase (EC 2.7.11.1)                                                                              | 2.57                       | 1.97                     |
| PP_0412      | PP_0412       | Polyamine ABC transporter, periplasmic polyamine-binding protein                                          | 2.49                       | 1.63                     |
| PP_0614      | PP_0614       | Putative N-carbamoyl-beta-alanine amidohydrolase/allantoine amidohydrolase 1 (EC 3.5.1.6) (EC 3.5.3.9)    | 1.26                       | 4.13                     |
| PP_0658      | PP_0658       | Homocysteine S-methyltransferase family protein                                                           | 1.06                       | 1.16                     |
| PP_0743      | <i>yfcH</i>   | Conserved protein with NAD(P)-binding Rossmann-fold domain                                                | 1.32                       | 2.44                     |
| PP_0766      | PP_0766       | Uncharacterized protein                                                                                   | 2.03                       | 2.02                     |
| PP_0901      | <i>colR</i>   | DNA-binding response regulator                                                                            | 1.05                       | 4.08                     |
| PP_0940      | <i>tldD</i>   | Putative protease involved in Microcin B17 maturation and in sensitivity to the DNA gyrase inhibitor LetD | 2.47                       | 1.05                     |
| PP_1141      | <i>livK</i>   | Branched-chain amino acids ABC transporter-periplasmic leucine binding subunit                            | 3.08                       | 1.65                     |
| PP_1291      | PP_1291       | PhoH family protein                                                                                       | 2.46                       | 2.27                     |
| PP_1478      | PP_1478       | Putative Xenobiotic reductase                                                                             | 5.55                       | 3.09                     |
| PP_1502      | PP_1502       | OmpA family protein                                                                                       | 1.83                       | 2.09                     |
| PP_1743      | <i>actP-I</i> | Acetate permease                                                                                          | 2.95                       | 3.78                     |
| PP_2112      | <i>acnA-I</i> | Aconitate hydratase (Aconitase) (EC 4.2.1.3)                                                              | 2.63                       | 1.29                     |
| PP_2215      | PP_2215       | Acetyl-CoA acetyltransferase (EC 2.3.1.9)                                                                 | 1.41                       | 1.57                     |
| PP_2335      | <i>prpC</i>   | Citrate synthase                                                                                          | 2.07                       | 3.50                     |
| PP_2364      | PP_2364       | Uncharacterized protein                                                                                   | 2.06                       | 1.16                     |
| PP_3668      | <i>katG</i>   | Catalase-peroxidase (CP) (EC 1.11.1.21) (Peroxidase/catalase)                                             | 2.89                       | 1.22                     |
| PP_4011      | <i>icd</i>    | Isocitrate dehydrogenase [NADP] (EC 1.1.1.42)                                                             | 1.66                       | 2.32                     |
| PP_4034      | <i>hyuC</i>   | N-carbamoyl-beta-alanine amidohydrolase/allantoine amidohydrolase 2 (EC 3.5.1.6) (EC 3.5.3.9)             | 5.27                       | 2.53                     |
| PP_4036      | <i>pydB</i>   | D-hydantoinase/dihydropyrimidinase (EC 3.5.2.2)                                                           | 2.50                       | 2.68                     |
| PP_4038      | <i>pydA</i>   | NADP-dependent dihydropyrimidine dehydrogenase subunit PreA (EC 1.3.1.2)                                  | 2.66                       | 1.65                     |
| PP_4064      | <i>ivd</i>    | Isovaleryl-CoA dehydrogenase (EC 1.3.8.4)                                                                 | 1.62                       | 1.85                     |
| PP_4065      | <i>mccB</i>   | Methylcrotonyl-CoA carboxylase biotin-containing subunit beta (EC 6.4.1.4)                                | 1.31                       | 1.65                     |
| PP_4067      | <i>mccA</i>   | Methylcrotonyl-CoA carboxylase biotin-containing subunit alpha (EC 6.4.1.4)                               | 1.25                       | 1.82                     |
| PP_4116      | <i>aceA</i>   | Isocitrate lyase (EC 4.1.3.1)                                                                             | 2.66                       | 2.06                     |
| PP_4193      | <i>sdhC</i>   | Succinate dehydrogenase membrane b-556 subunit (EC 1.3.5.1)                                               | 1.60                       | 1.45                     |
| PP_4279      | <i>xdhB</i>   | Xanthine dehydrogenase subunit XdhB (EC 1.17.1.4)                                                         | 1.71                       | 1.78                     |

|         |                             |                                                                                                                                                     |      |      |
|---------|-----------------------------|-----------------------------------------------------------------------------------------------------------------------------------------------------|------|------|
| PP_4299 | <i>glxR</i>                 | Tartronate semialdehyde reductase (EC 1.1.1.60)                                                                                                     | 2.10 | 2.24 |
| PP_4402 | <i>bkdAB</i>                | Branched-chain alpha-keto acid dehydrogenase complex, beta subunit (EC 1.2.1.25) (EC 1.2.4.4)                                                       | 4.04 | 1.85 |
| PP_4487 | <i>acsA1</i>                | Acetyl-coenzyme A synthetase 1 (AcCoA synthetase 1) (Acs 1) (EC 6.2.1.1) (Acetate--CoA ligase 1) (Acyl-activating enzyme 1)                         | 3.48 | 2.77 |
| PP_4591 | <i>rnd</i>                  | Ribonuclease D (RNase D) (EC 3.1.13.5)                                                                                                              | 1.20 | 1.13 |
| PP_4620 | <i>hmgB</i>                 | Fumarylacetoacetase (EC 3.7.1.2)                                                                                                                    | 2.06 | 1.58 |
| PP_4621 | <i>hmgA</i>                 | Homogentisate 1,2-dioxygenase (HGDO) (EC 1.13.11.5) (Homogentisate oxygenase) (Homogentisic acid oxidase) (Homogentisicase)                         | 1.39 | 1.80 |
| PP_4666 | <i>mmsB</i>                 | 3-hydroxyisobutyrate dehydrogenase (HIBADH) (EC 1.1.1.31)                                                                                           | 2.65 | 3.06 |
| PP_4667 | <i>mmsA-II</i>              | Methylmalonate-semialdehyde dehydrogenase (EC 1.2.1.27)                                                                                             | 1.83 | 2.66 |
| PP_4702 | <i>acsA2</i><br><i>acsB</i> | Acetyl-coenzyme A synthetase 2 (AcCoA synthetase 2) (Acs 2) (EC 6.2.1.1) (Acetate--CoA ligase 2) (Acyl-activating enzyme 2)                         | 1.78 | 1.82 |
| PP_4945 | <i>rlmJ</i>                 | Ribosomal RNA large subunit methyltransferase J (EC 2.1.1.266) (23S rRNA (adenine(2030)-N6)-methyltransferase) (23S rRNA m6A2030 methyltransferase) | 1.52 | 1.15 |
| PP_5165 | <i>plpB</i>                 | NLPA lipoprotein                                                                                                                                    | 1.35 | 1.24 |
| PP_5186 | <i>argE</i>                 | Acetylmithine deacetylase (EC 3.-.-.-) (EC 3.5.1.-) (EC 3.5.1.16)                                                                                   | 1.65 | 1.15 |

**Figure S1: Workflow of AfBPP.** Three experiments were run where (1) promysalin photoaffinity probe was incubated with the bacteria, (2) 5x excess promysalin was incubated with the bacteria **prior** to exposure to the probe, and (3) an inactive probe molecule was incubated with the bacteria. Experiments 2 and 3 will allow for the identification of non-specific targets to be taken into account when analyzing the data from experiment 1. In all cases bacteria and compound were incubated prior to irradiation. Upon covalent interaction the cells were clicked with biotin-azide, enriched, digested, and labeled for analysis via LC-MS/MS.

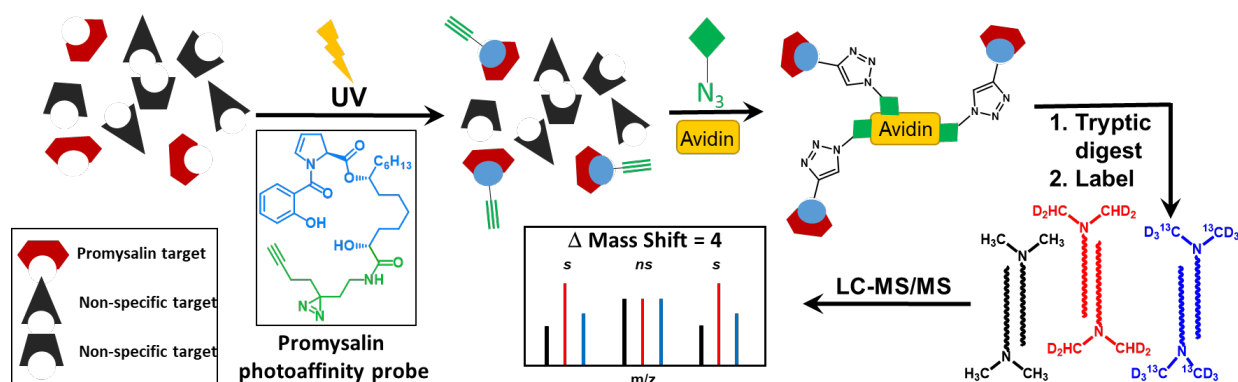

**Table S2: RNA Sequencing reads mapping statistics of cDNA libraries.**

<sup>a</sup> Reads were mapped to the *Pseudomonas putida* KT2440 genome. <sup>b</sup> quantity of reads when *Pseudomonas putida* KT2440 cells were treated with 50 uM promysalin. <sup>c</sup> quantity of reads when *Pseudomonas putida* KT2440 cells were treated with DMSO control.

| <b>Sequence read type<sup>a</sup></b> | <b>Promysalin treated<sup>b</sup></b> | <b>Control<sup>c</sup></b> |
|---------------------------------------|---------------------------------------|----------------------------|
| <b>Total reads</b>                    | 109,540,045                           | 151,278,351                |
| <b>Aligned 0 times</b>                | 3,488,427                             | 12,422,474                 |
| <b>Aligned &gt;1 time</b>             | 2,522,000                             | 3,054,800                  |
| <b>Uniquely aligned</b>               | 103,539,618                           | 135,801,077                |

**Figure S2: Swimming motility of *P.putida* KT2440 on swimming medium in the presence of DMSO (control) or promysalin.** Swim plates were inoculated with bacteria from grown overnight on TSB plates containing 1.5% agar. Bacteria were resuspended in TSB and a sterile needle was used to inoculate the swim plates. Plates were kept at room temperature for 20-24 hrs and then photographed. Two independent assays were performed with two technical replicates for each independent assay.

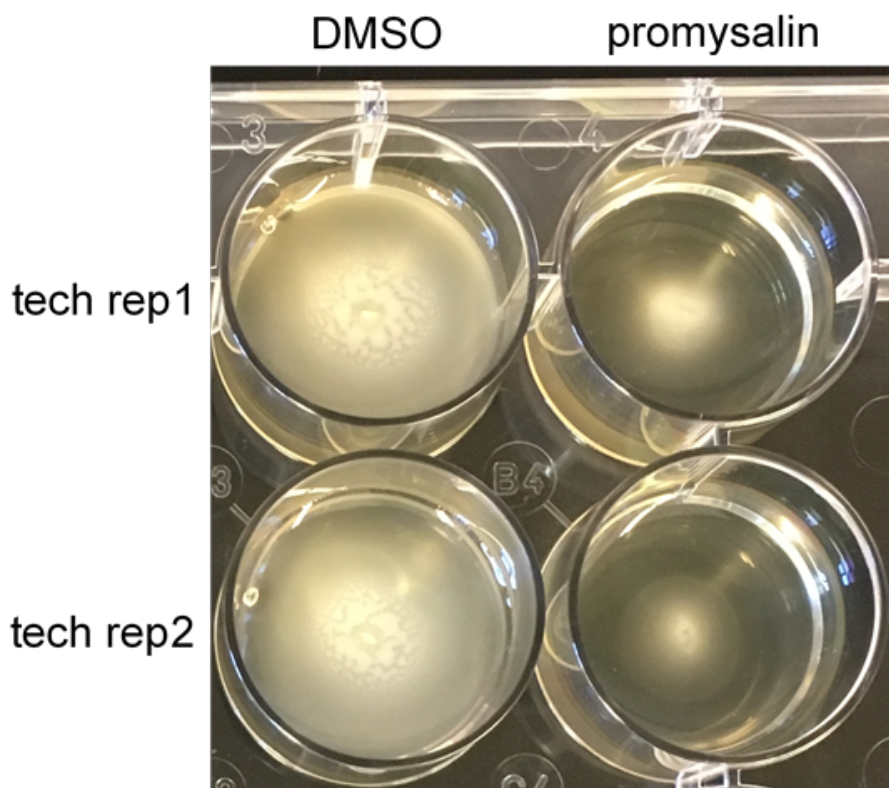

**Figure S3: Swimming and swarming assays with promysalin treatment.** Promysalin promotes swarming and inhibits swimming. Together this suggests flagella are not expressed or inhibited in proper function. \*pictures taken after 20 hours

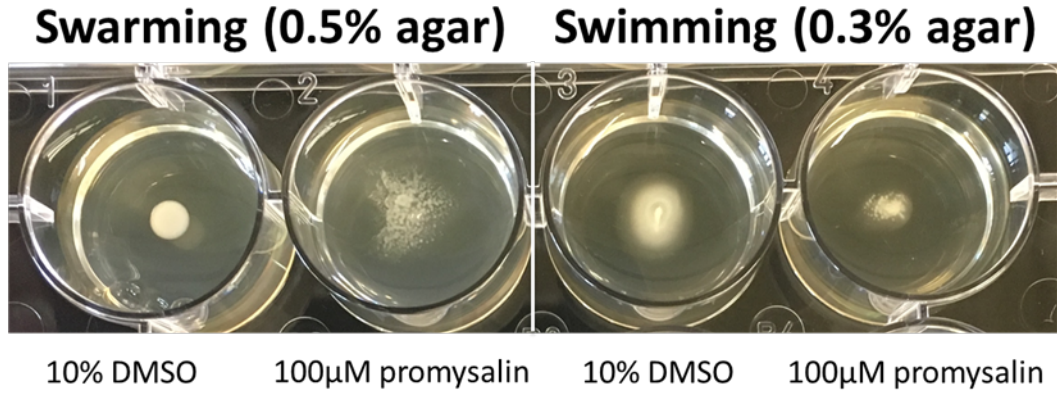

**Figure S4:** Western blot of *P. putida* KT2440 cells when exposed to DMSO (control) or promysalin.

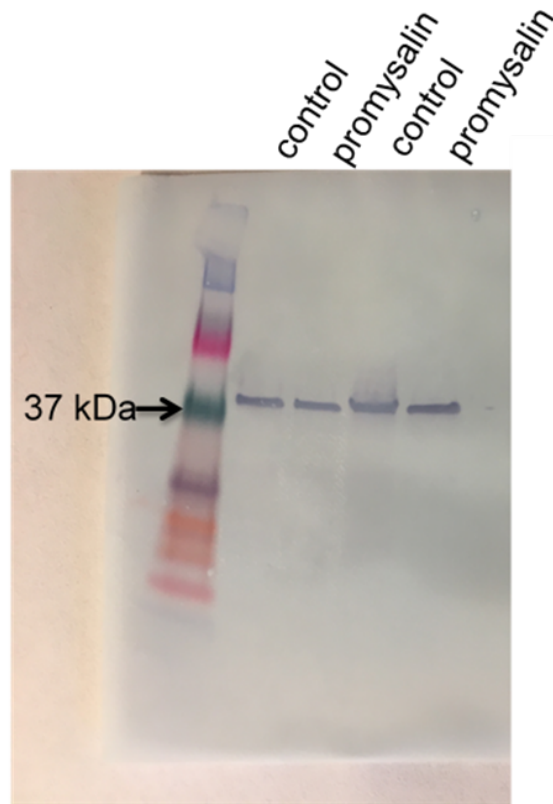

**Figure S5.** Volcano plots showing mean counts (y-axis) and fold change (log<sub>2</sub>; x-axis) of genes involved in iron-binding and/or homeostasis. Points colored orange indicate those genes predicted to encode iron binding proteins.

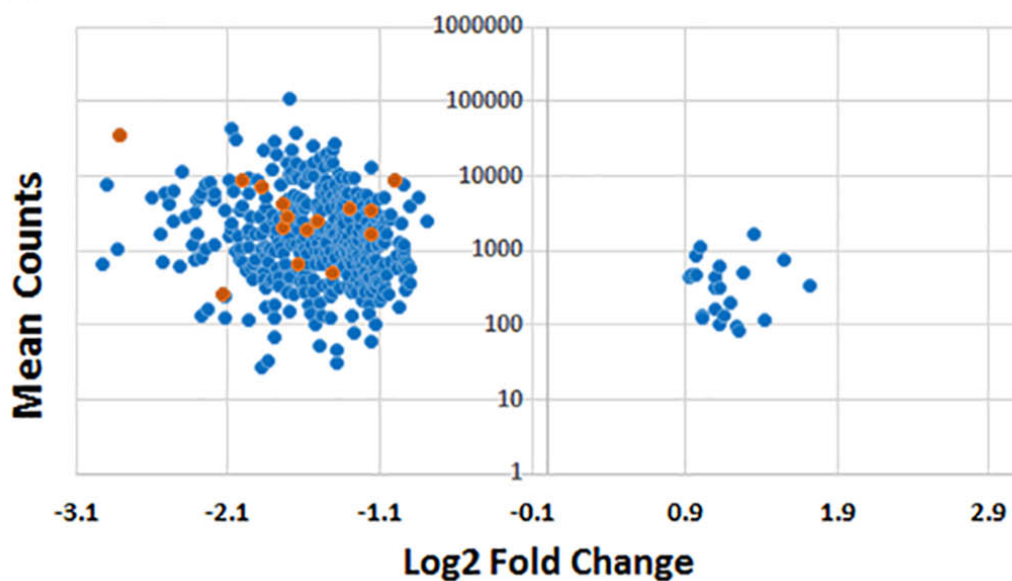

**Table S3:** Genes involved in iron homeostasis that were down-regulated in *P. putida* KT2440 with promysalin treatment.

| Locus   | Gene          | Protein                                  | Fold Change | P-value (adj) |
|---------|---------------|------------------------------------------|-------------|---------------|
| PP_0160 | PP_0160       | Putative ferrioxamine receptor           | -2.45       | 6.66E-03      |
| PP_0481 | <i>katA</i>   | Catalase                                 | -3.68       | 2.86E-05      |
| PP_0482 | <i>bfr-I</i>  | Bacterioferritin                         | -4.03       | 6.64E-04      |
| PP_0489 | <i>fdoG</i>   | Formate dehydrogenase-O major subunit    | -2.00       | 1.28E-03      |
| PP_1082 | <i>bfr-II</i> | Bacterioferritin                         | -7.01       | 1.32E-04      |
| PP_3332 | PP_3332       | Putative cytochrome c-type protein       | -4.38       | 1.16E-02      |
| PP_3823 | PP_3823       | Cytochrome c-type protein                | -2.66       | 1.16E-03      |
| PP_4251 | <i>ccoO-I</i> | Cytochrome c oxidase subunit, cbb3-type  | -3.34       | 2.21E-03      |
| PP_4253 | <i>ccoP-I</i> | Cbb3-type cytochrome c oxidase subunit   | -2.23       | 1.82E-04      |
| PP_4324 | <i>ccmD</i>   | Heme exporter protein D                  | -3.10       | 1.83E-03      |
| PP_4325 | <i>ccmC</i>   | Protoheme IX reservoir complex subunit   | -3.25       | 2.56E-02      |
| PP_4839 | PP_4839       | Putative iron-regulated membrane protein | -2.99       | 8.46E-03      |
| PP_4856 | PP_4856       | Ferritin, Dps family protein             | -3.36       | 5.61E-04      |
| PP_5212 | PP_5212       | Oxidoreductase, iron-sulfur-binding      | -2.85       | 6.02E-03      |
| PP_5267 | PP_5267       | Putative cytochrome c5                   | -2.23       | 5.20E-04      |

**Figure S6: Relative expression levels measured by qRT-PCR.** Quantitative real-time PCR was performed using cDNA prepared from the samples. The fold-induction of the genes in promysalin treated samples over that in control samples was calculated using the  $2^{-\Delta\Delta Ct}$  method.

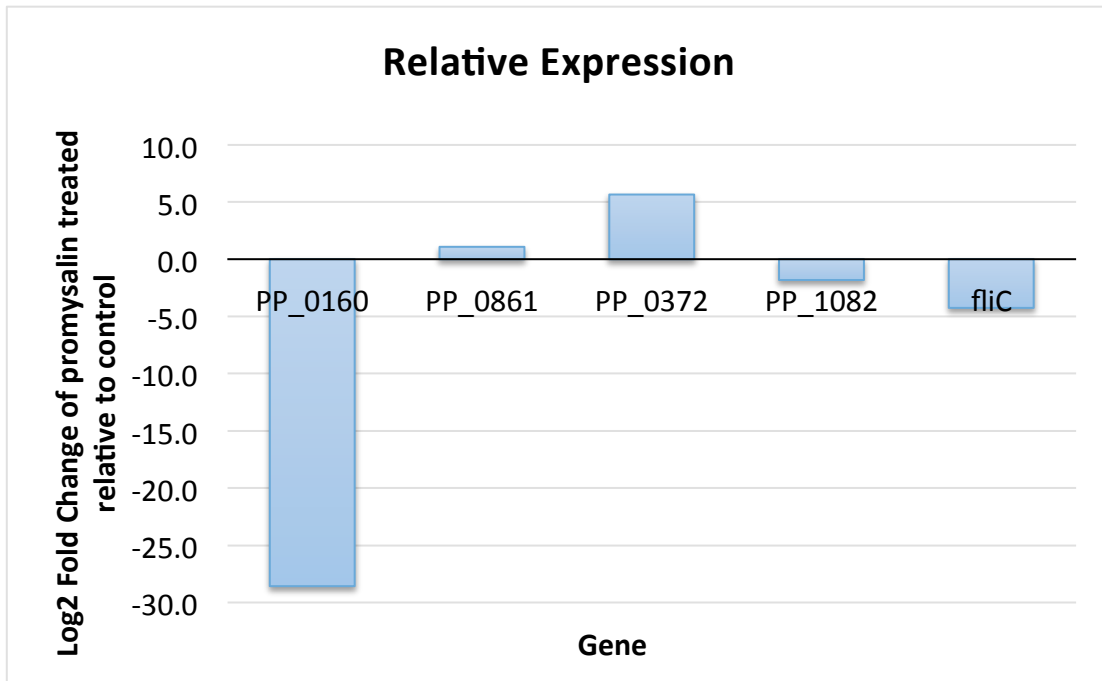

Supplement: NIHMS1017687-supplement-SI.pdf [file NIHMS1017687-supplement-SI.pdf]
